# Supplementary material
Source: PubMed Central journal article supplement (PMC9034761)
Supplement: NIHMS1788411-supplement-Suppl_Data.pdf [file NIHMS1788411-supplement-Suppl_Data.pdf]

An interruptive alert while inputting orders for a patient

A non-interruptive alert while performing discharge planning for a patient

**Important (1)**

**Recommend Rifaximin Use in Patients with Cirrhosis/Hepatic Encephalopathy**

To reduce the risk of readmissions for hospitalized patients taking lactulose for hepatic encephalopathy, the recommendation from Michigan Medicine is dual treatment with lactulose and rifaximin. Questions can be directed to Dr. Elliot Tapper at [etapper@med.umich.edu](mailto:etapper@med.umich.edu)

Please contact the **Transitions of Care Pharmacy Team at 734 [REDACTED]** at least 1-2 days prior to discharge to assess if rifaximin will be covered on discharge.

To continue ordering rifaximin, click '**Accept**' below.

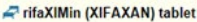

Acknowledge Reason

**BestPractice Advisories**

**Important (1)**

**Rifaximin Continuation on Discharge Reminder** Collapse X

This patient has an active inpatient rifaximin order. To reduce the risk of readmissions for hospitalized patients taking lactulose for hepatic encephalopathy, the recommendation from Michigan Medicine is dual treatment with lactulose and rifaximin. Please continue rifaximin therapy following discharge. Questions can be directed to Dr. Elliot Tapper at [etapper@med.umich.edu](mailto:etapper@med.umich.edu)

Please contact the **Transitions of Care Pharmacy Team at 734 [REDACTED]** ASAP to assess if rifaximin will be covered on discharge.

Acknowledge Reason
